# Supplementary material for: Cognitive impairment and depression precede increased HDL-C levels in middle-aged and older Chinese adults: cross-lagged panel analyses
Source: PubMed Central journal article supplement — Lipids Health Dis. 2024 Sep 9;23:288. doi: 10.1186/s12944-024-02285-9 (PMC11382475; doi:10.1186/s12944-024-02285-9), 2024-09-09
Supplement: 12944_2024_2285_MOESM1_ESM.pdf [file 12944_2024_2285_MOESM1_ESM.pdf]

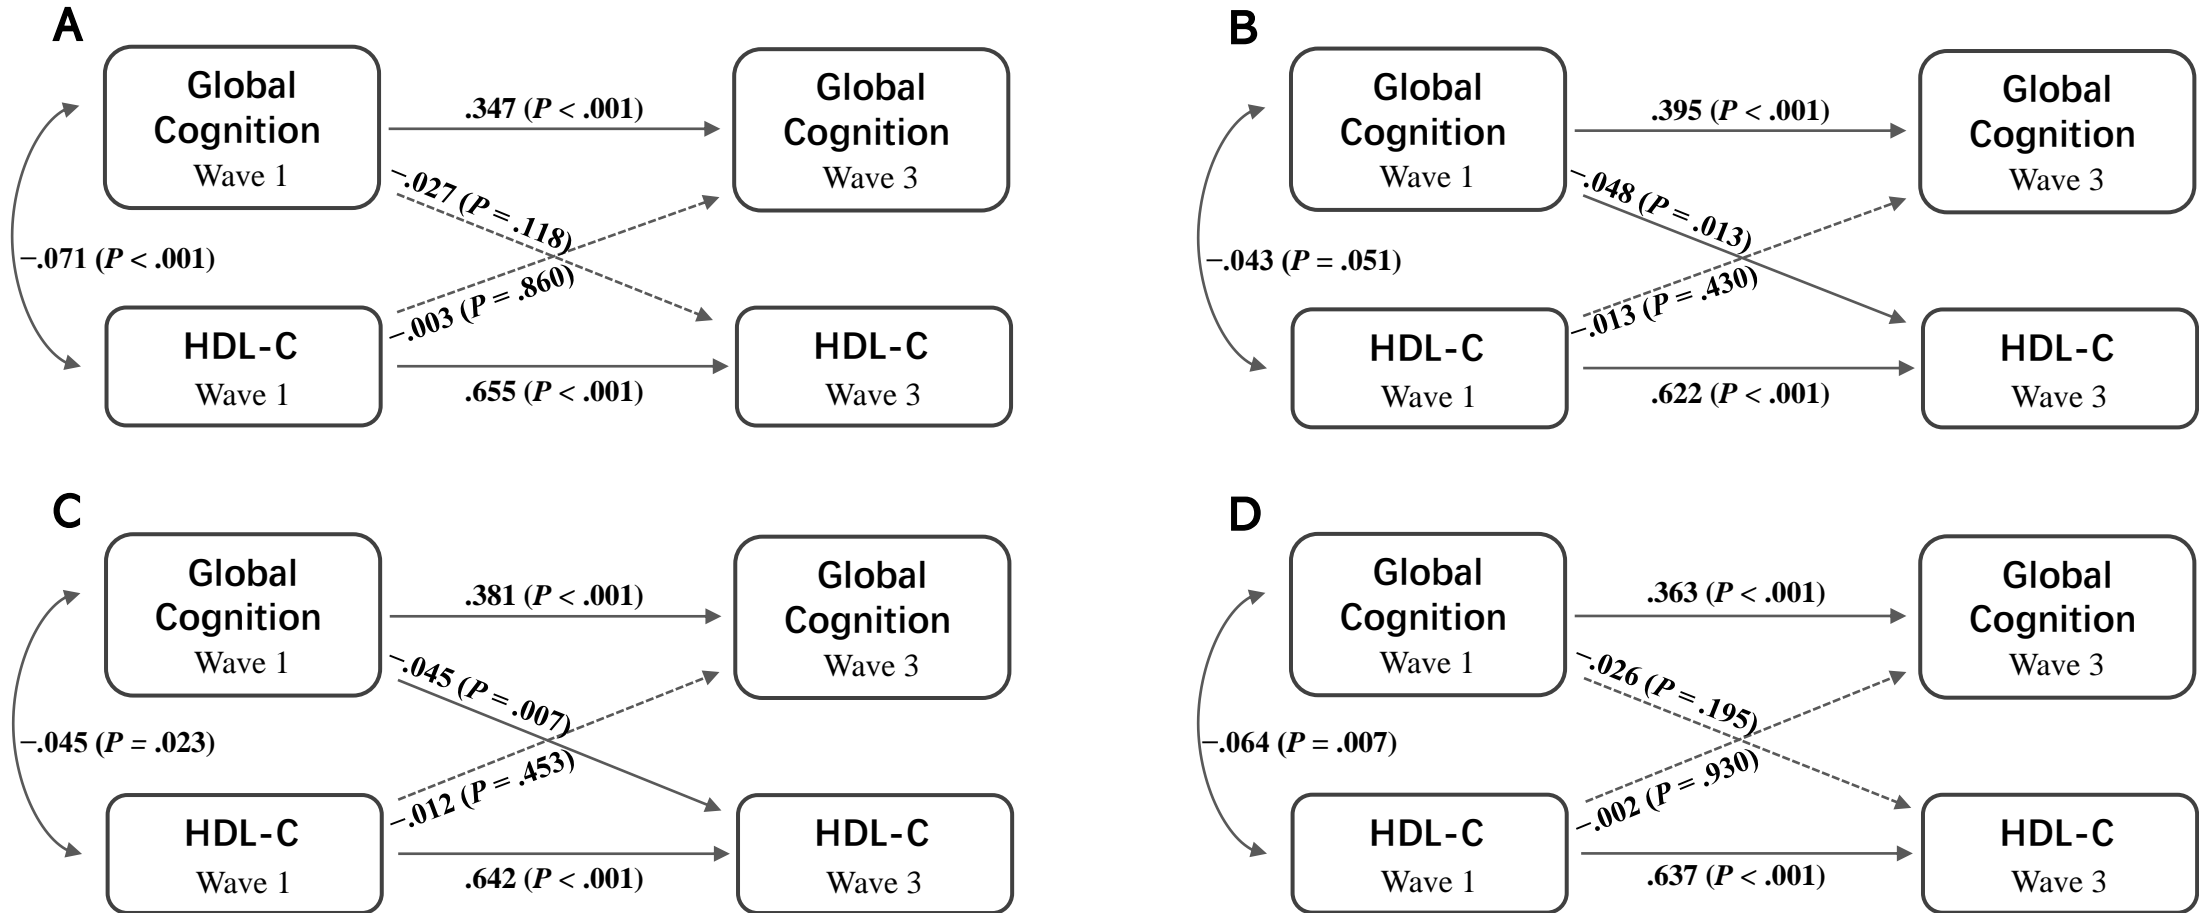

**Supplementary Figure 1:** Cross-lagged panel models of HDL-C levels and cognition based on sex and age subgroup analyses. A. Male subgroup (n=2225) B. Female subgroup (n=2077) C. Participants aged 45 to under 60 years (n=2550) D. Participants aged 60 and above (n=1752). Standardized structural regression coefficients are presented.

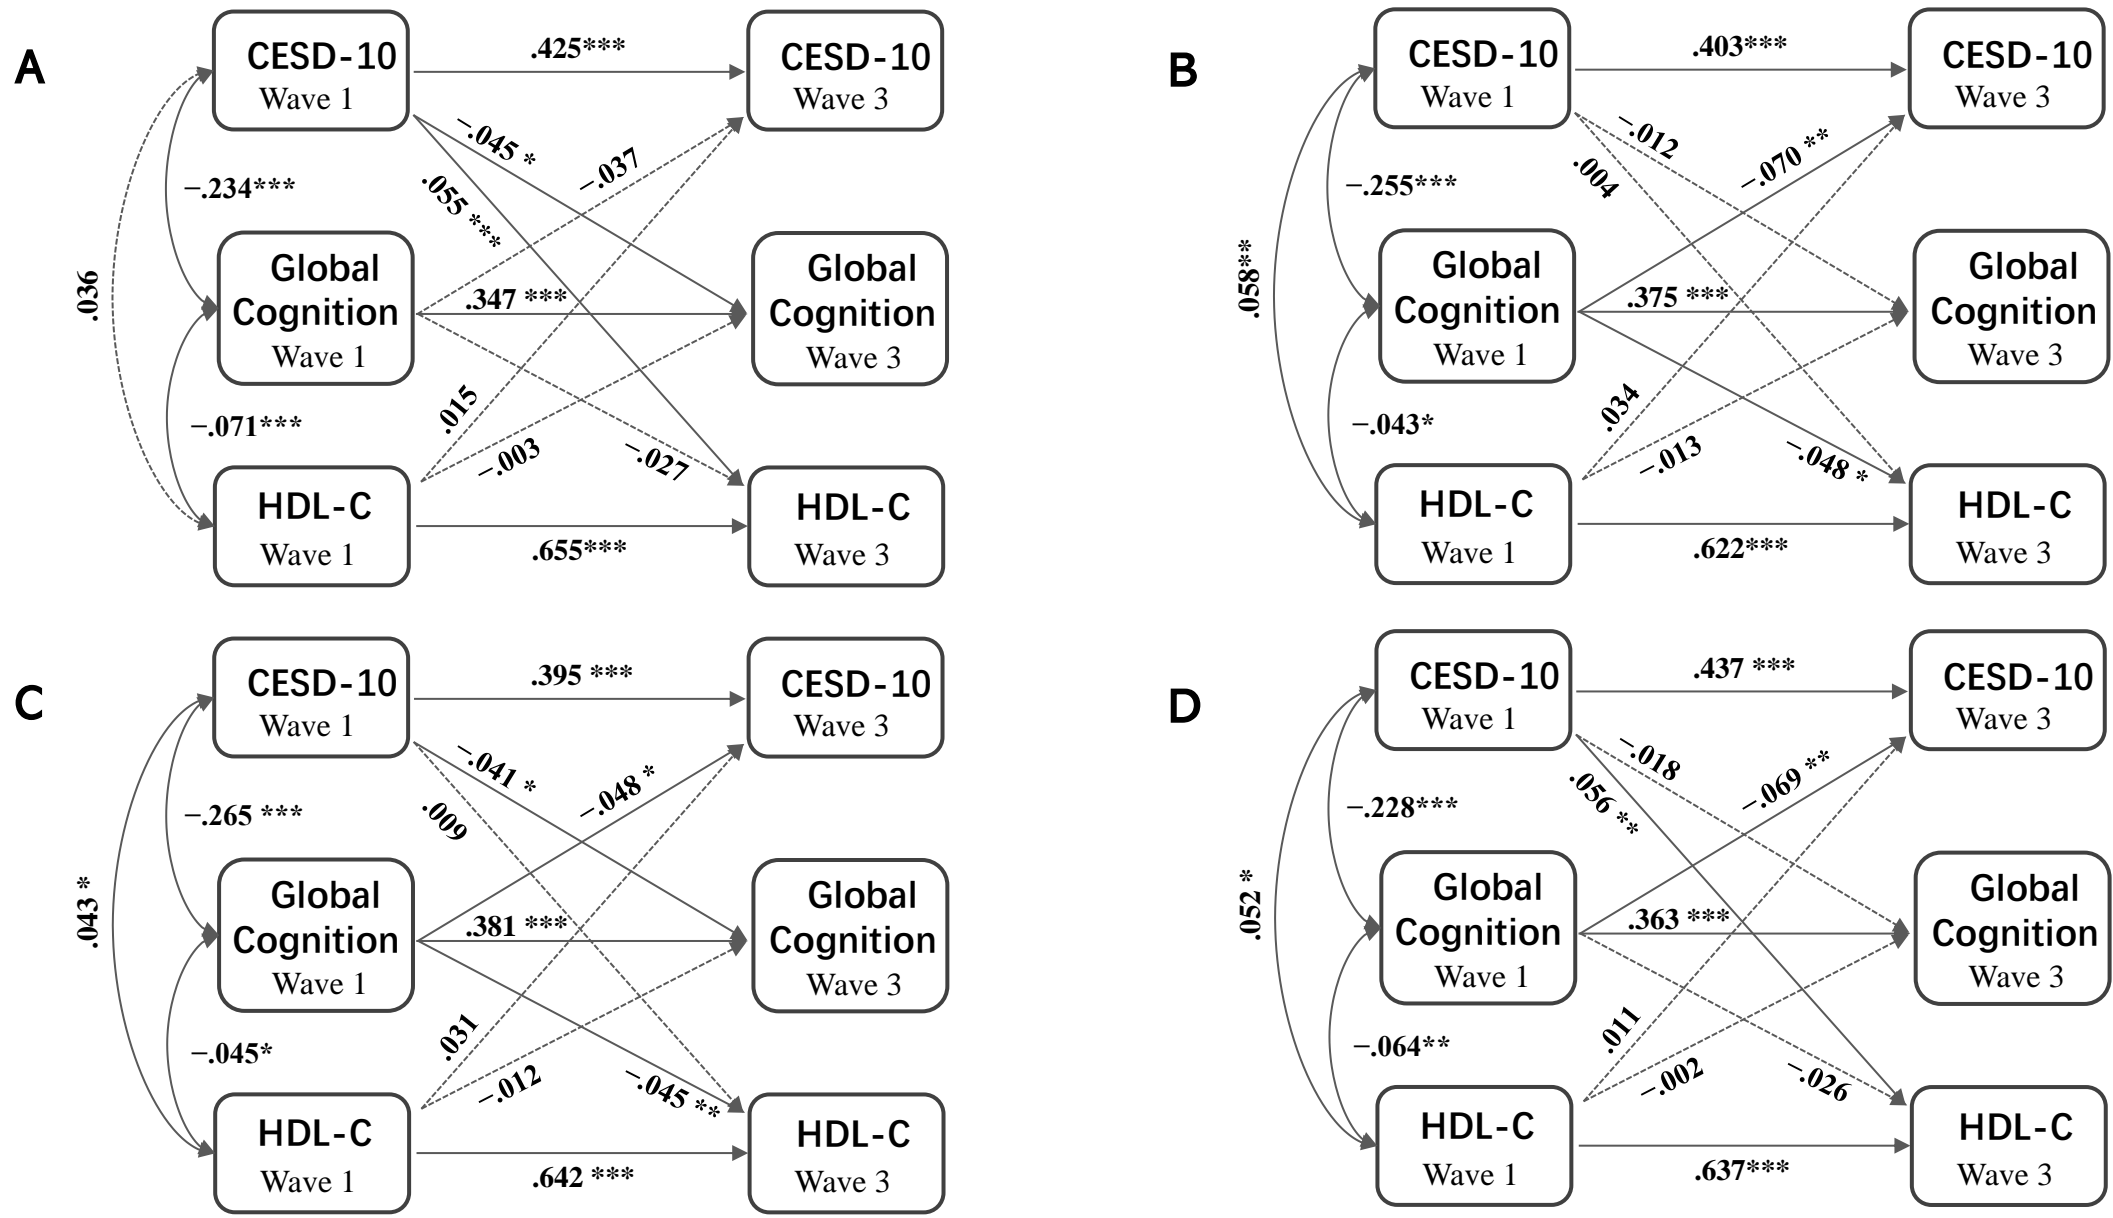

**Supplementary Figure 2:** Cross-lagged panel model of the associations among depressive symptoms, cognition, and HDL-C, based on age and sex subgroup analyses. A. Male subgroup (n=2225) B. Female subgroup (n=2077) C. Participants aged 45 to under 60 years (n=2550) D. Participants aged 60 and above (n=1752). Standardized structural regression coefficients are presented. \* $P < 0.05$ , \*\* $P < 0.01$ , \*\*\* $P < 0.001$
